# Supplementary material
Source: HighWire-hosted journal article supplement (https://bmjophth.bmj.com/content/9/1/e001475)
Supplement: inline-supplementary-material-1 [file inline-supplementary-material-1.pdf]

1 **Appendix A.** Extended interview questions

2 **Topic Guide for Semi-Structured Interviews**

3 The topic guide was developed based on the Theoretical Framework of Acceptability (TFA),  
4 which was created to provide a framework for assessing the multiple facets of acceptability of  
5 health interventions. The TFA has seven components: “1) affective attitude, 2) burden, 3)  
6 ethicality, 4) intervention coherence, 5) opportunity costs, 6) perceived effectiveness, and 7) self-  
7 efficacy”.

8

9

10 **Interview questions**

11 \* Before the call

- 12 1. What did you expect the experience of talking to Dora to be like before you received  
13 the call?  
14 2. How did you feel about talking to Dora before you received the call?  
15 3. What, if any, concerns did you have before you received the call?  
16 4. How well did you understand Dora before you received the call?  
17 5. What benefits or losses did you think you would experience when you received the  
18 call?  
19 6. How successful did you think Dora would be at delivering the follow-up before you  
20 had the call?  
21 7. How confident were you that you would be able to interact with Dora before you  
22 received the call?

23 \* During the call

- 24 1. How did you feel about your experience interacting with Dora?  
25 2. How much effort did interacting with Dora take?  
26 3. What concerns, if any, did you have while talking with Dora?  
27 4. How well did you understand how the call worked while you were talking to Dora?  
28 5. What benefits or losses did you experience while you were talking to Dora?  
29 6. How much confidence did you have in Dora's ability to perform the follow-up  
30 assessment while you were talking to Dora?  
31 7. How comfortable and confident were you in your ability to interact with Dora while  
32 you were on the phone?

33 \* After the call

- 34 8. Looking back on the experience now, how do you feel about using Dora to perform  
35 follow-up appointments?  
36 9. Looking back on the experience now, how much effort did interacting with Dora take?  
37 10. Looking back on the experience now, what concerns, if any, do you have about Dora?  
38 11. Looking back on the experience now, how well do you understand how Dora worked?  
39 12. Looking back on the experience now, what do you think you gained or lost by having  
40 your follow-up assessment with Dora?  
41 13. Looking back on the experience now, how well do you think Dora performed at  
42 conducting your follow-up assessment?  
43 14. Looking back on the experience now, how confident would you be having another  
44 interaction with Dora?

45 \* General feedback

- 46 15. What would you suggest to make the experience of using Dora better?  
47 16. How willing would you be to use Dora again?  
48 17. If you had the choice between no follow-up/ a face-to-face appointment (depending on  
49 clinical site) and Dora, which would you choose and why?  
50 18. Is there anything else you'd like to mention?  
51
